# Supplementary material for: Discovery of the gut microbial signature driving the efficacy of prebiotic intervention in obese patients
Source: HighWire-hosted journal article supplement (doi:10.1136/gutjnl-2019-319726), 2020-02-10
Supplement: gutjnl-2019-319726supp005_data_supplement.pdf [file gutjnl-2019-319726supp005_data_supplement.pdf]

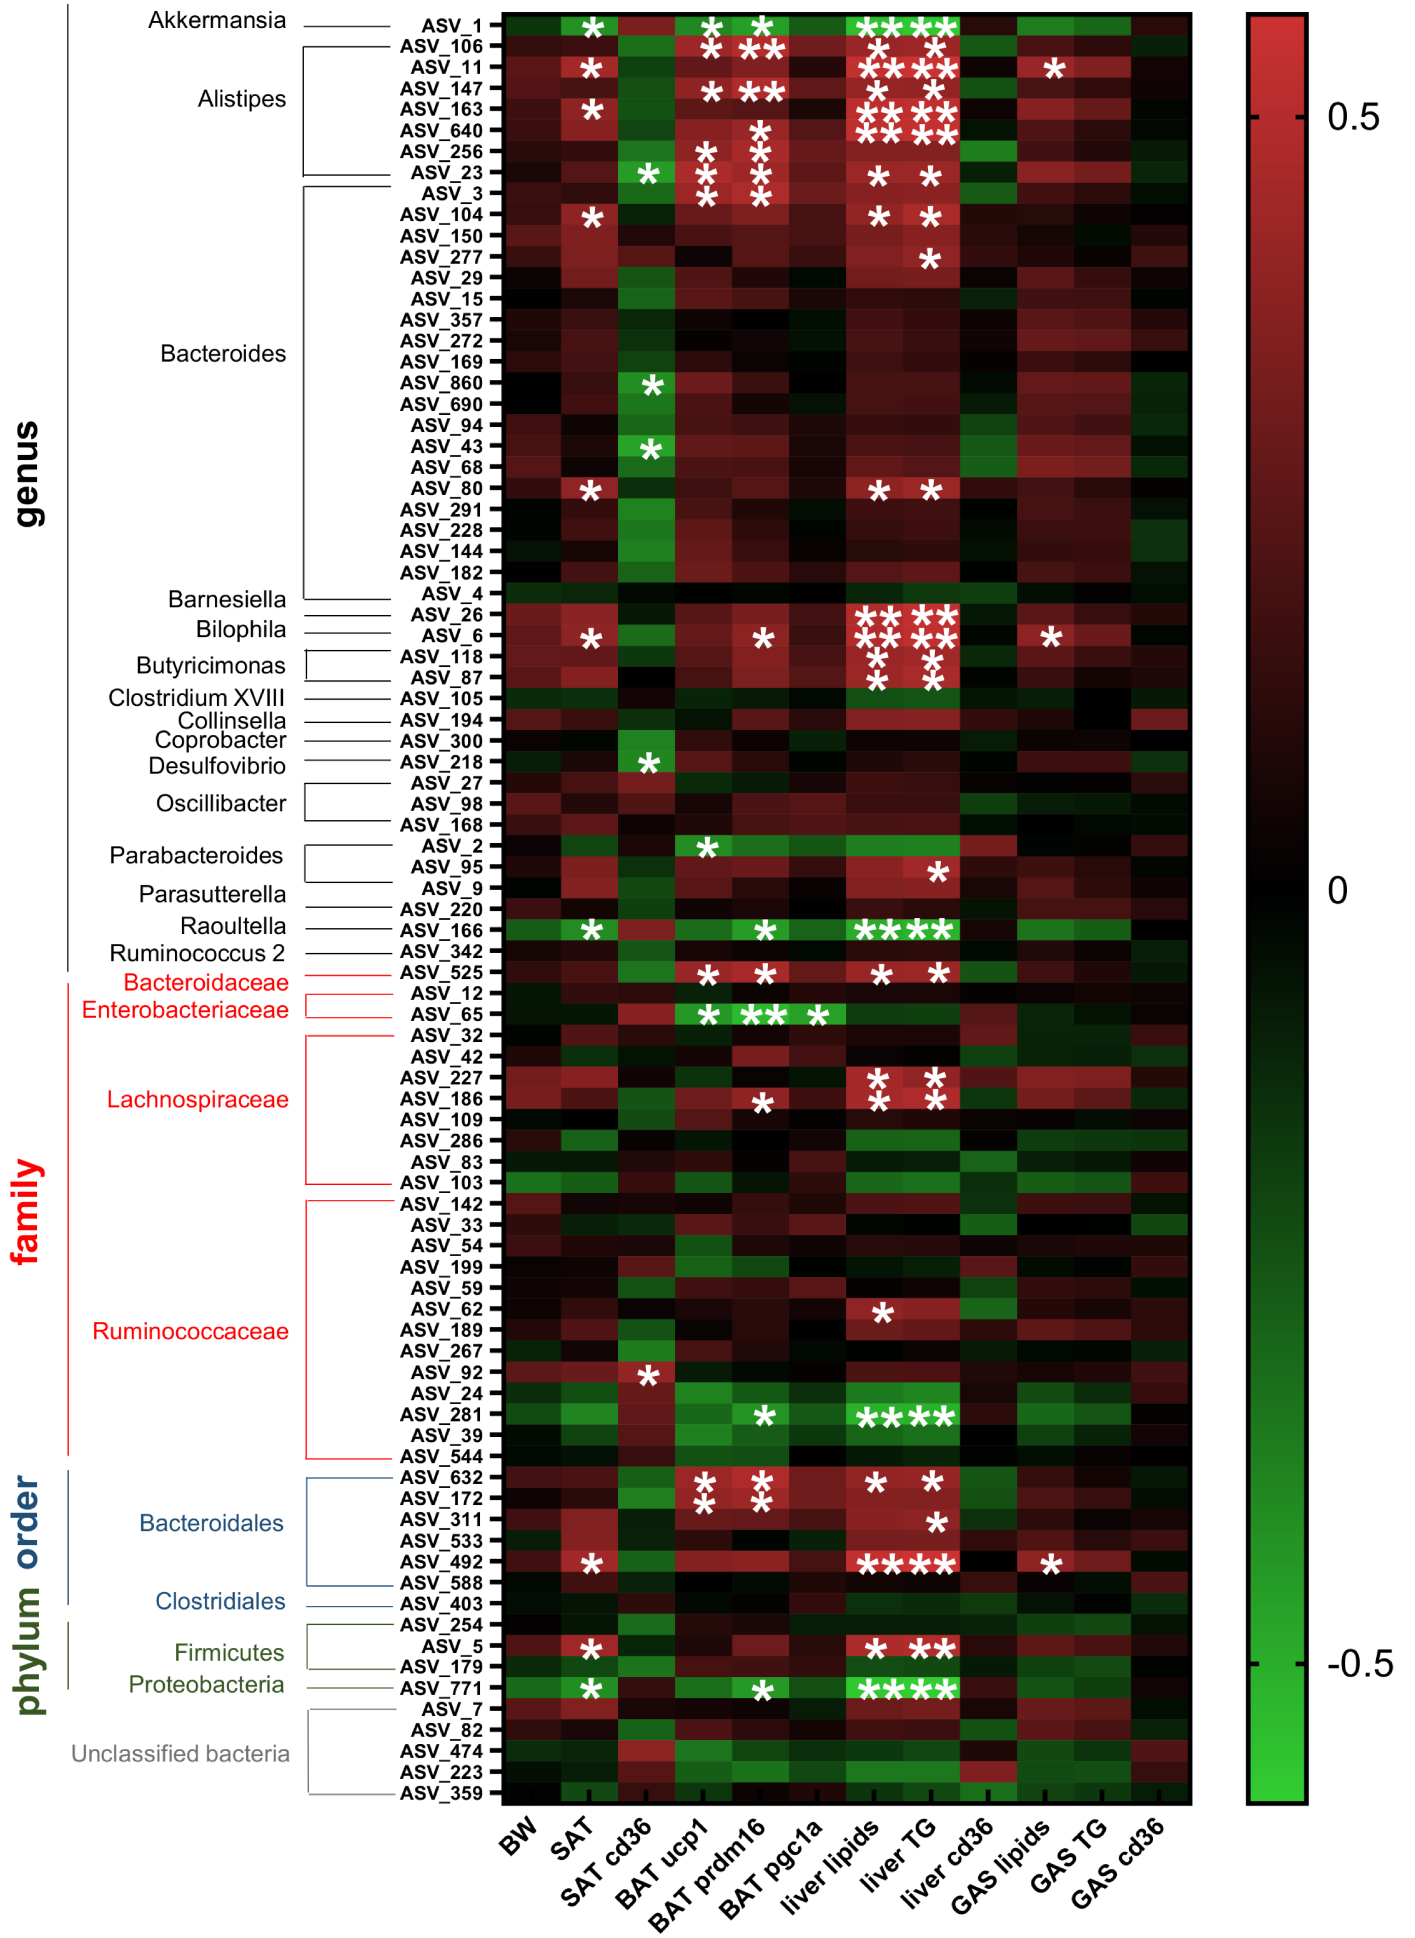

Supplemental Figure 3
