# Supplementary figures and images for: Discovery of the gut microbial signature driving the efficacy of prebiotic intervention in obese patients
Source: PubMed Central journal article supplement — Gut. 2020 Feb 10;69(11):1975–87. doi: 10.1136/gutjnl-2019-319726 (PMC7569399; doi:10.1136/gutjnl-2019-319726), 2020-02-10

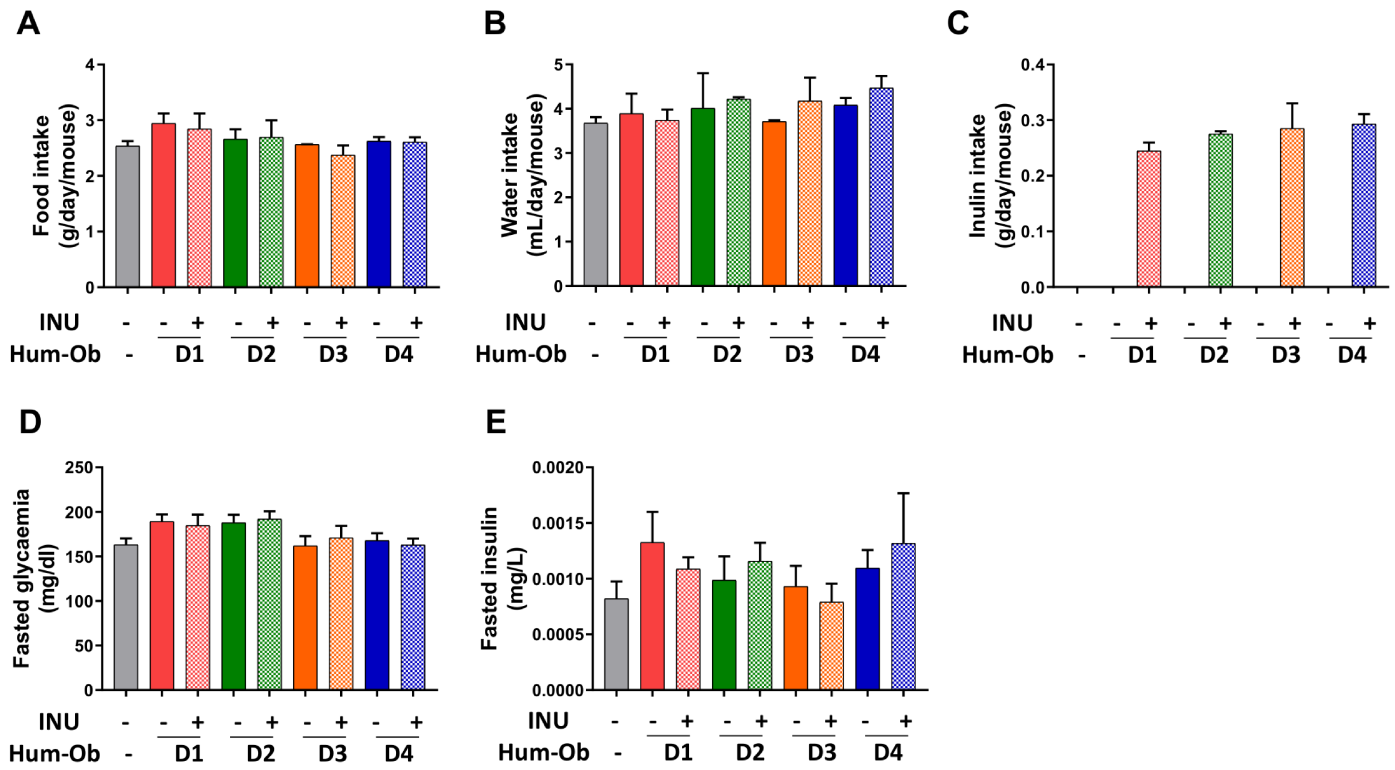

Supplemental Figure 1

Supplement: gutjnl-2019-319726supp003.pdf [file gutjnl-2019-319726supp003.pdf]

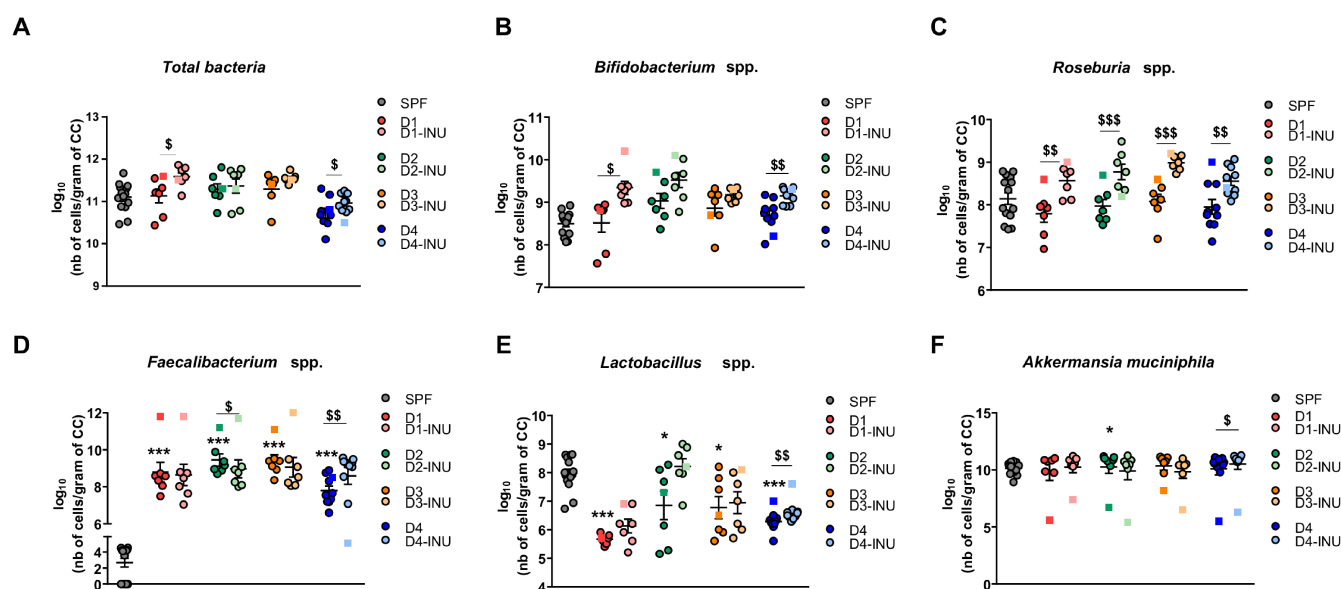

Supplemental Figure 2

Supplement: gutjnl-2019-319726supp004.pdf [file gutjnl-2019-319726supp004.pdf]

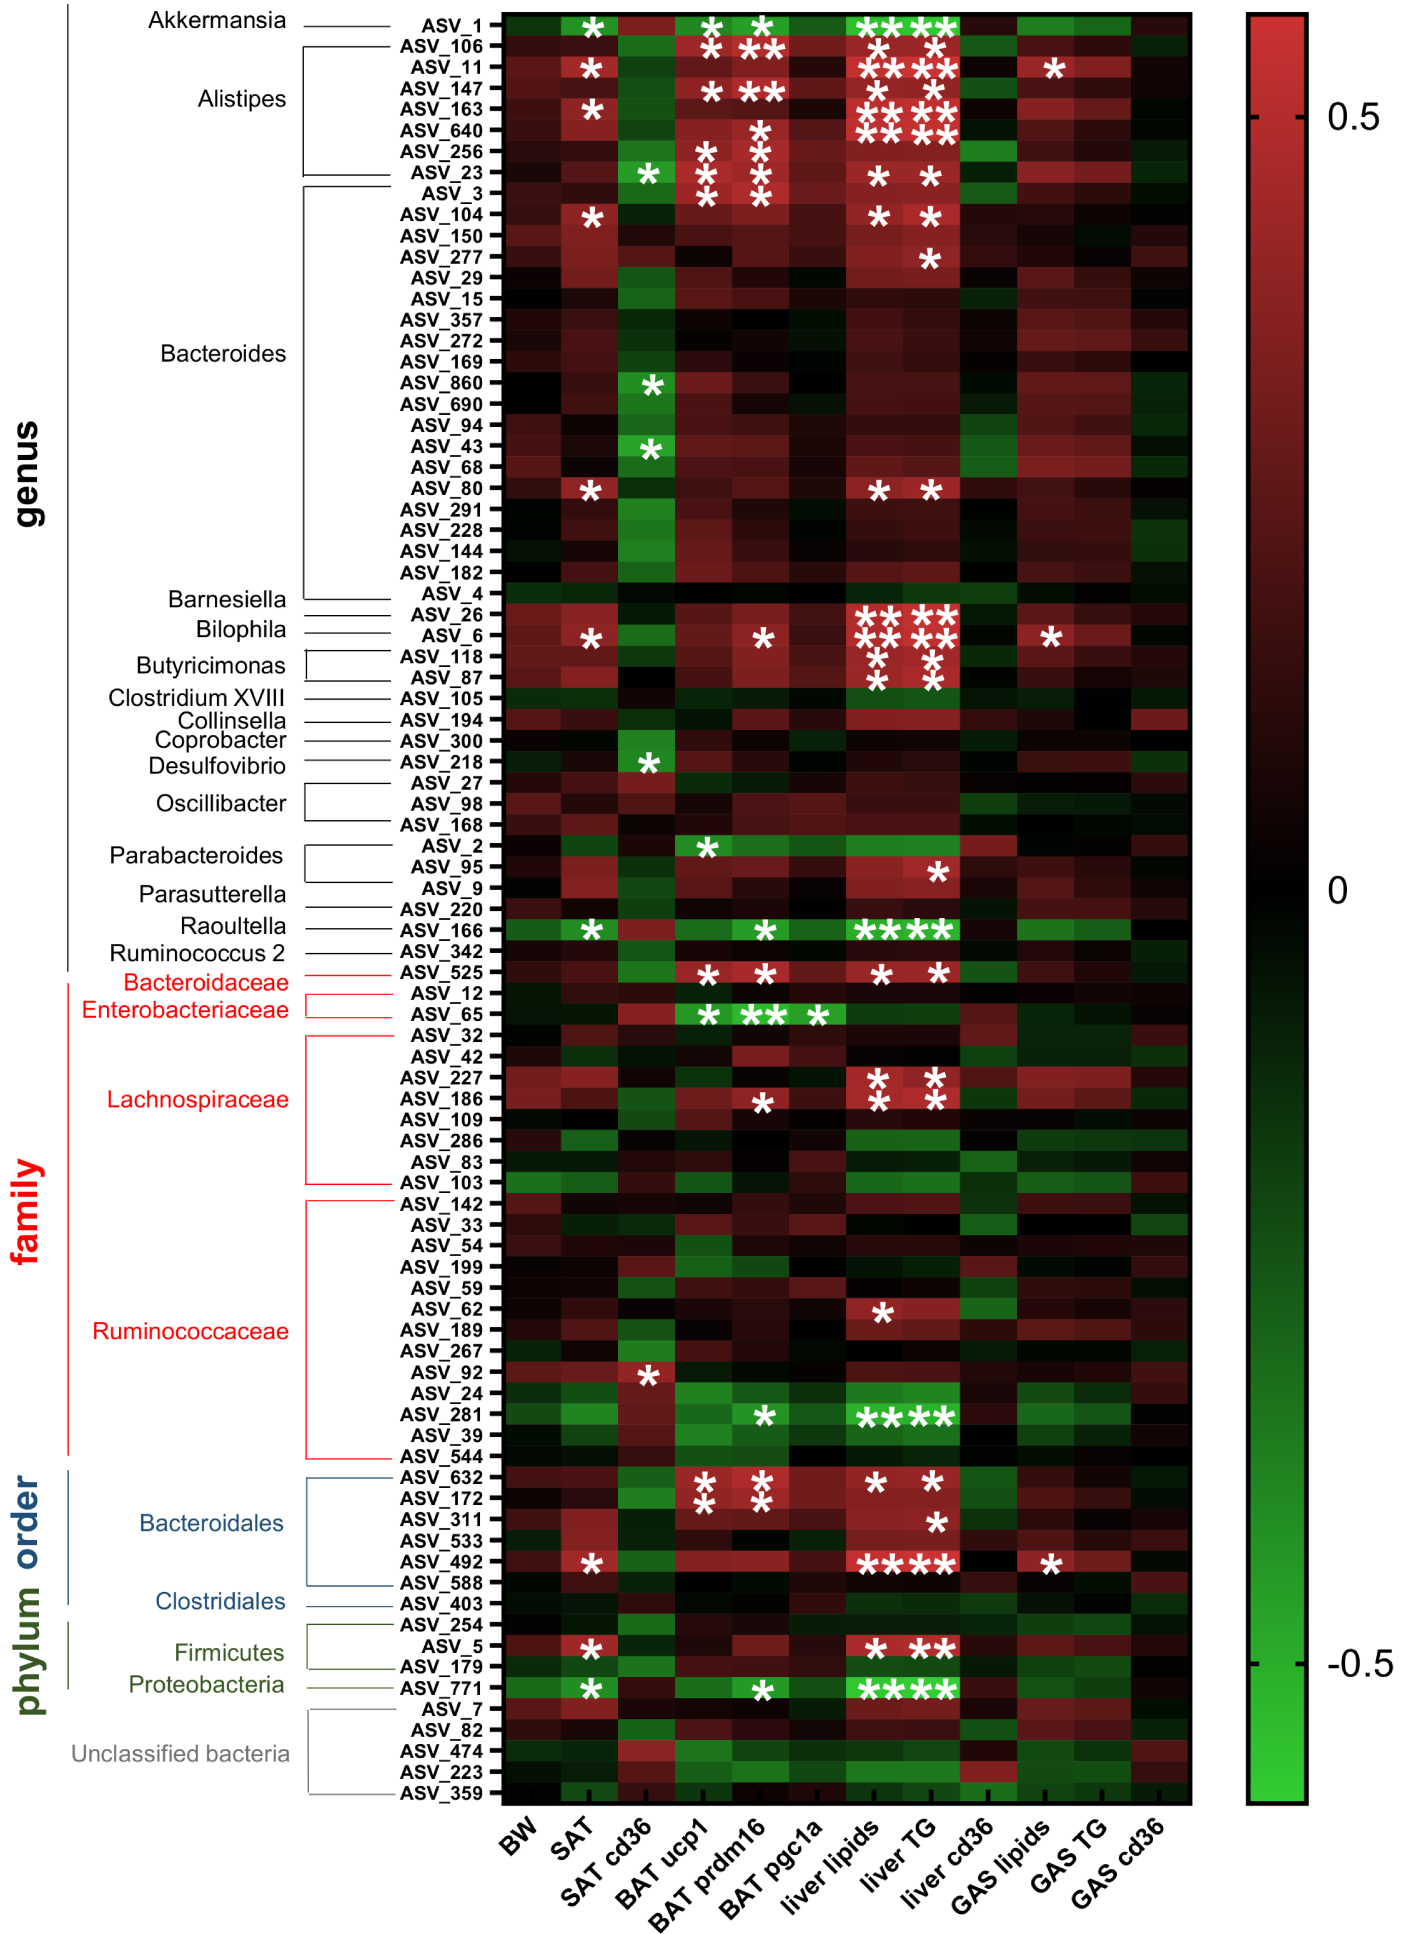

Supplemental Figure 3

Supplement: gutjnl-2019-319726supp005.pdf [file gutjnl-2019-319726supp005.pdf]

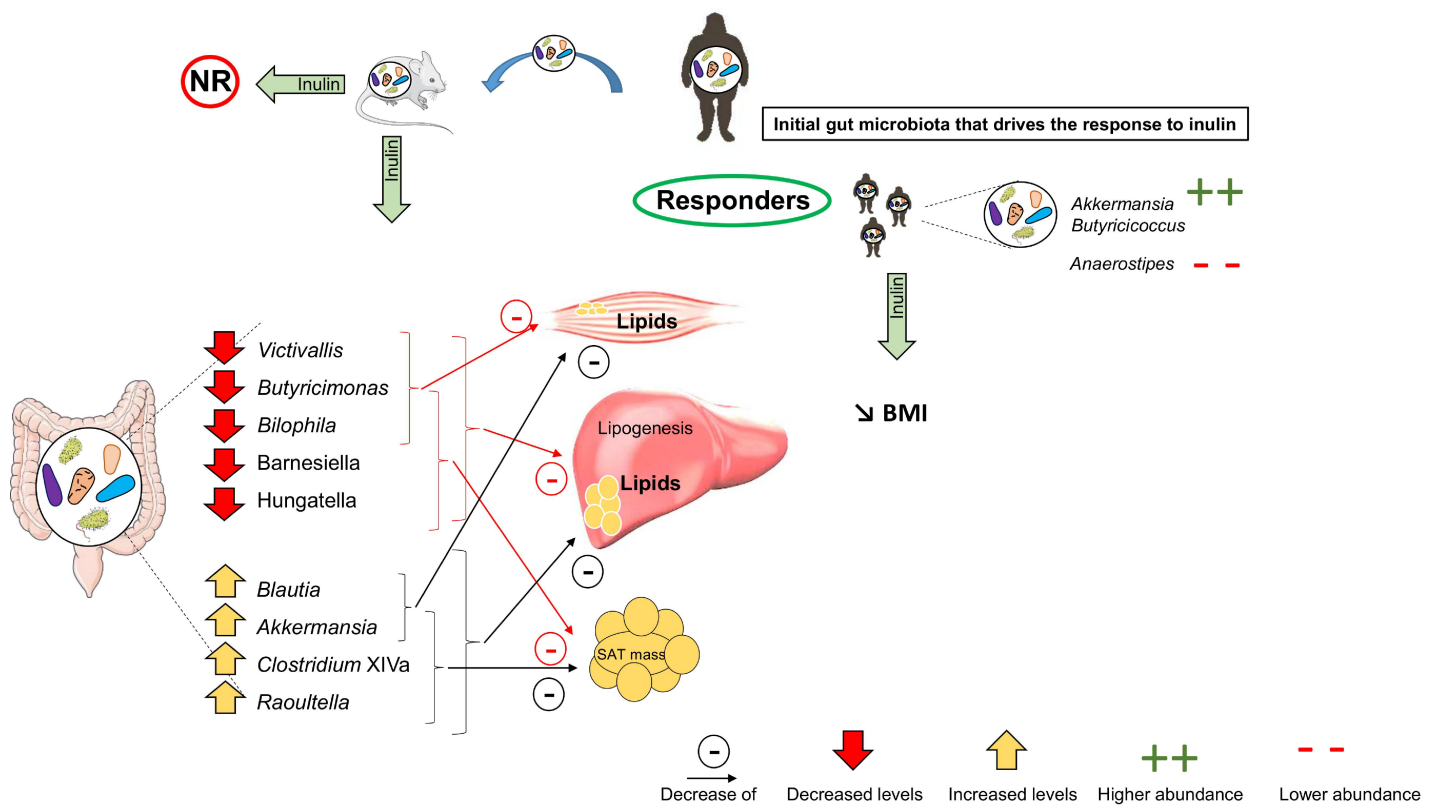

Supplement: gutjnl-2019-319726supp006.pdf [file gutjnl-2019-319726supp006.pdf]
